# Supplementary material
Source: MDPI journal article supplement (https://www.mdpi.com/2073-4352/13/8/1264)
Supplement: s1 [file s1]

# Supplementary Materials

## Formation of fluorapatite in the equilibrium system CaO–P<sub>2</sub>O<sub>5</sub>–HF–H<sub>2</sub>O at 298 K in a nitrogen atmosphere

Marina V. Chaikina<sup>1</sup>, Natalia V. Bulina<sup>1,\*</sup>, Igor Yu. Prosanov<sup>1</sup>, Arcady V. Ishchenko<sup>2</sup>

<sup>1</sup> Institute of Solid State Chemistry and Mechanochemistry, Siberian Branch of Russian Academy of Sciences

<sup>2</sup> G.K. Boreskov Institute of Catalysis, Siberian Branch of Russian Academy of Sciences

\* Correspondence: [bulina@solid.nsc.ru](mailto:bulina@solid.nsc.ru)

**Table S1.** EDX analysis of element composition of the crystals. The data was obtained using a scanning electron micro-scope (SEM) Hitachi 3400N with energy dispersive X-ray attachment for element analysis.

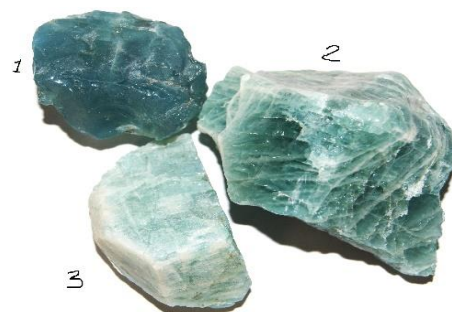

### Crystal 1:

| Region #1 | Ca    | P     | F    | O     | C    | Si   |  | Cl   |  | Cu   | Sum    |
|-----------|-------|-------|------|-------|------|------|--|------|--|------|--------|
| at%       | 21.31 | 11.23 | 4.01 | 58.61 | 4.30 | 0.25 |  | 0.07 |  | 0.20 | 99.98  |
| wt%       | 37.30 | 15.19 | 3.33 | 40.95 | 2.26 | 0.31 |  | 0.11 |  | 0.56 | 100.01 |

| Region #2 | Ca    | P     | F    | O     | C    | Si   | Na   | Nb   |  |  | Sum    |
|-----------|-------|-------|------|-------|------|------|------|------|--|--|--------|
| at%       | 19.60 | 11.20 | 3.74 | 59.42 | 5.62 | 0.19 | 0.19 | 0.04 |  |  | 100.00 |
| wt%       | 35.13 | 15.52 | 3.18 | 42.53 | 3.02 | 0.24 | 0.20 | 0.18 |  |  | 100.00 |

| Region #3 | Ca    | P     | F    | O     | C    | Si   |  | Cl   |  |  | Sum    |
|-----------|-------|-------|------|-------|------|------|--|------|--|--|--------|
| at%       | 20.24 | 11.38 | 3.25 | 59.59 | 5.29 | 0.16 |  | 0.09 |  |  | 100.00 |
| wt%       | 36.06 | 15.67 | 2.74 | 42.37 | 2.82 | 0.20 |  | 0.14 |  |  | 100.00 |

### Crystal 2:

| Region #1 | Ca    | P     | F    | O     | C    | Si   |  |  |  | Cu   | Sum    |
|-----------|-------|-------|------|-------|------|------|--|--|--|------|--------|
| at%       | 21.66 | 10.97 | 4.12 | 58.35 | 4.33 | 0.21 |  |  |  | 0.37 | 100.01 |
| wt%       | 37.73 | 14.77 | 3.40 | 40.57 | 2.26 | 0.26 |  |  |  | 1.01 | 100.00 |

| Region #2 | Ca    | P     | F    | O     | C    | Si   | Na   | B    | Fe   | Cu   | Sum    |
|-----------|-------|-------|------|-------|------|------|------|------|------|------|--------|
| at%       | 19.20 | 10.21 | 3.96 | 58.68 | 4.15 | 0.17 | 0.22 | 3.27 | 0.10 | 0.32 | 100.28 |
| wt%       | 34.73 | 14.28 | 3.17 | 42.38 | 2.25 | 0.21 | 0.23 | 1.60 | 0.25 | 0.92 | 100.02 |

| Region #3 | Ca    | P     | F    | O     | C    | Si   |  | Pb   | Nb   | Cu   | Sum    |
|-----------|-------|-------|------|-------|------|------|--|------|------|------|--------|
| at%       | 19.06 | 10.98 | 4.35 | 59.14 | 6.09 | 0.16 |  | 0.00 | 0.01 | 0.21 | 100.00 |

|     |       |       |      |       |      |      |  |      |      |      |       |
|-----|-------|-------|------|-------|------|------|--|------|------|------|-------|
| wt% | 34.33 | 15.29 | 3.72 | 42.53 | 3.29 | 0.20 |  | 0.00 | 0.02 | 0.61 | 99.99 |
|-----|-------|-------|------|-------|------|------|--|------|------|------|-------|

**Crystal 3:**

| Region #1 | Ca    | P     | F    | O     | C    |  |  | Fe   | Nb   | Cu   | Sum    |
|-----------|-------|-------|------|-------|------|--|--|------|------|------|--------|
| at%       | 19.37 | 11.38 | 3.99 | 59.34 | 5.55 |  |  | 0.16 | 0.04 | 0.17 | 100.00 |
| wt%       | 34.60 | 15.71 | 3.38 | 42.31 | 2.97 |  |  | 0.40 | 0.15 | 0.47 | 99.99  |

| Region #2 | Ca    | P     | F    | O     | C    | Si   |  |  |  | Cu   | Sum    |
|-----------|-------|-------|------|-------|------|------|--|--|--|------|--------|
| at%       | 20.59 | 11.11 | 4.46 | 58.53 | 4.75 | 0.26 |  |  |  | 0.30 | 100.00 |
| wt%       | 36.29 | 15.14 | 3.73 | 41.18 | 2.51 | 0.32 |  |  |  | 0.83 | 100.00 |

| Region #3 | Ca    | P     | F    | O     | C    | Si   |  |  |  | Cu   | Sum    |
|-----------|-------|-------|------|-------|------|------|--|--|--|------|--------|
| at%       | 20.94 | 10.73 | 4.71 | 58.16 | 4.82 | 0.29 |  |  |  | 0.36 | 100.01 |
| wt%       | 36.81 | 14.58 | 3.92 | 40.81 | 2.54 | 0.35 |  |  |  | 0.99 | 100.00 |
